# Supplementary material for: Identification of an intronic enhancer regulating RANKL expression in osteocytic cells
Source: PubMed Central journal article supplement (PMC10415388; doi:10.1038/s41413-023-00277-6), 2023-08-11

**A**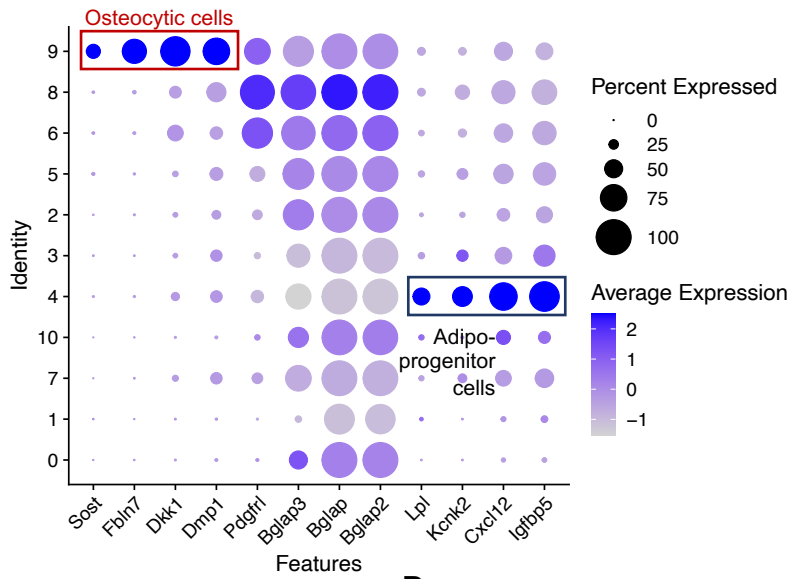**C**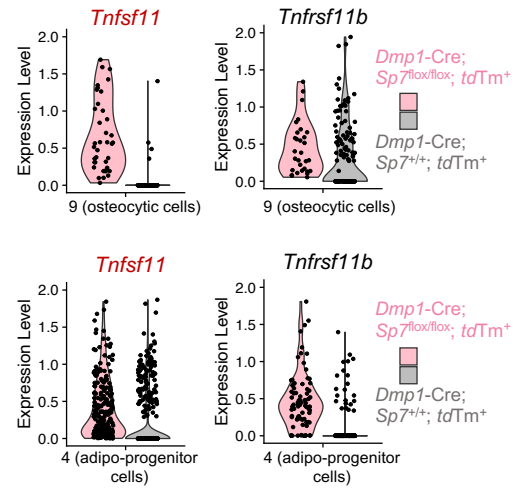**B**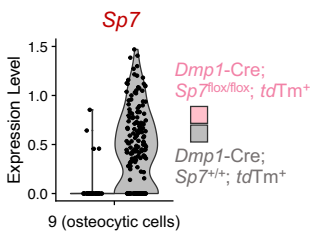**D**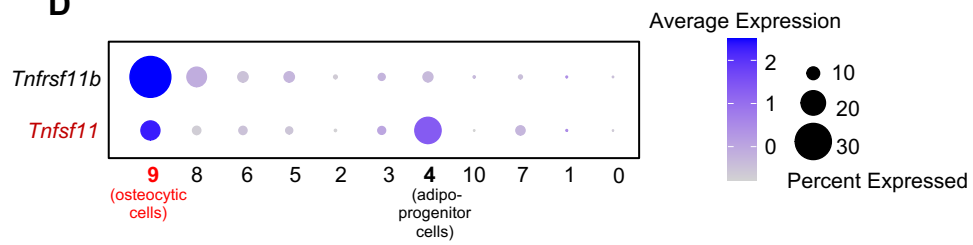

Supplement: 41413_2023_277_MOESM1_ESM.pdf [file 41413_2023_277_MOESM1_ESM.pdf]
